# Supplementary material
Source: publisher site journal article supplement (https://www.dovepress.com/article/488138)
Supplement: Supplementary file 1 [file get_supplementary_file.php]

| Supplementary Table 1. The survival rates of patients with different Couinaud's segmentation classifications | | | | | | | | |
| --- | --- | --- | --- | --- | --- | --- | --- | --- |
|  | SBRT/RFA group before Matching | | | | SBRT/RFA after Matching | | | |
|  | 1-year | 3-year | 5-year | *p* value | 1-year | 3-year | 5-year | *p* value |
| S2/S3 | | | | | | | | |
| OS rate (%) | 97.5/98.3 | 86.7/86.5 | 69.2/70.3 | 0.849 | 96.2/98.0 | 87.8/91.2 | 66.7/78.0 | 0.493 |
| PFS rate (%) | 80.0/76.6 | 50.8/48.3 | 38.8/28.7 | 0.432 | 75.0/75.0 | 54.0/47.5 | 35.1/31.8 | 0.678 |
| LC rate (%) | 98.7/98.2 | 95.8/92.1 | 93.1/92.1 | 0.613 | 100.0/97.9 | 100.0/90.8 | 95.8/90.8 | 0.153 |
| DMFS rate (%) | 81.4/80.0 | 52.2/53.1 | 39.6/29.8 | 0.547 | 75.0/78.8 | 54.5/53.1 | 34.9/33.4 | 0.909 |
| S4 | | | | | | | | |
| OS rate (%) | 95.8/94.9 | 82.2/89.1 | 75.7/85.6 | 0.507 | 100.0/94.8 | 80.6/88.9 | 71.8/85.4 | 0.387 |
| PFS rate (%) | 83.5/94.9 | 61.7/80.1 | 48.0/53.0 | 0.272 | 87.2/94.7 | 64.9/79.6 | 46.0/52.7 | 0.354 |
| LC rate (%) | 97.1/97.5 | 91.7/97.5 | 88.6/92.9 | 0.499 | 100.0/97.4 | 96.9/97.4 | 87.0/92.8 | 0.573 |
| DMFS rate (%) | 84.9/97.3 | 67.6/82.1 | 51.5/58.6 | 0.267 | 87.2/97.2 | 70.0/85.4 | 51.1/58.3 | 0.347 |
| S5/S6 | | | | | | | | |
| OS rate (%) | 98.3/98.2 | 85.1/91.3 | 75.2/86.2 | 0.028 | 99.2/97.5 | 85.2/89.0 | 73.0/84.7 | 0.084 |
| PFS rate (%) | 86.5/80.1 | 63.5/52.1 | 41.9/29.1 | 0.026 | 84.0/81.5 | 62.6/53.1 | 40.6/29.5 | 0.119 |
| LC rate (%) | 97.8/97.7 | 94.5/92.8 | 93.1/92.8 | 0.974 | 98.4/97.6 | 94.8/91.9 | 92.8/91.9 | 0.798 |
| DMFS rate (%) | 84.2/81.8 | 64.6/54.8 | 44.6/31.3 | 0.016 | 84.7/82.9 | 65.7/56.8 | 43.9/32.7 | 0.102 |
| S7/S8 | | | | | | | | |
| OS rate (%) | 97.6/97.5 | 81.2/86.5 | 74.0/80.1 | 0.417 | 97.8/96.3 | 84.8/86.9 | 76.1/83.8 | 0.570 |
| PFS rate (%) | 84.8/83.5 | 59.1/56.9 | 46.4/46.4 | 0.688 | 92.7/80.7 | 60.0/57.8 | 46.9/46.0 | 0.568 |
| LC rate (%) | 99.4/94.4 | 97.9/87.1 | 96.6/85.3 | 0.001 | 99.3/92.4 | 98.4/86.6 | 96.0/85.1 | 0.006* |
| DMFS rate (%) | 85.4/87.0 | 60.4/62.1 | 47.4/48.2 | 0.803 | 86.0/85.2 | 61.5/63.5 | 48.1/48.4 | 0.971 |
